# Supplementary material for: Benchmarking differential expression analysis tools for RNA-Seq: normalization-based vs. log-ratio transformation-based methods
Source: Springer Nature journal article supplement (doi:10.1186/s12859-018-2261-8), 2018-07-18
Supplement: 12859_2018_2261_MOESM8_ESM.pdf [file 12859_2018_2261_MOESM8_ESM.pdf]

Scripts included in this .pdf file:

- (01) Calls polyester to generate Wave 1 simulated data
- (02) Calls polyester to generate Wave 2 simulated data
- (03) Runs tximport on Williams et al. data
- (04) Defines functions used to analyze simulated data
- (05) Benchmarks performance on simulated samples
- (06) Calculates FDR on simulated samples
- (07) Benchmarks performance on Williams et al. data
- (08) Analyze results and make figures from simulated runs
- (09) Analyze results and make figures from FDR runs
- (10) Analyze results and make figures from Williams et al. runs
- (11) Analyze DE overlap in Rollins et al. data
- (12) Analyze DE missed by edgeR

```

# Note: use branch of kcha/polyester with naive doMC support -- install via:
# devtools::install_github("kcha/polyester", ref =
"545e33c9776db2927f9a22c8c2f5bfde2b3081a7")
library(polyester)
library(Biostrings)
library(doMC)

# fa = "/home/richardm/bin/STAR-2.5.2/genomes/
Homo_sapiens.GRCh37.dna.primary_assembly.fa"
# gtf = "/home/richardm/bin/STAR-2.5.2/genomes/Homo_sapiens.GRCh37.87.gtf"
# Note: .fa file built using gffread with $fa and $gtf as input, i.e.,
# gffread $gtf -g $fa gffread-GRCh37.87.fasta
# mv gffread-GRCh37.87.fasta gffread-GRCh37.87.fa
fasta = "/home/richardm/bin/STAR-2.5.2/genomes/gffread-GRCh37.87.fa"
f <- readDNAStringSet(fasta)
out <- 'xstringset.fa'
writeXStringSet(f, out)

set.seed(3220)
case <- sample(c(4/1, 2/1, 3/2, 1/1, 2/3, 1/2, 1/4),
              size = length(f),
              replace = TRUE,
              prob = c(.03, .07, .09, .7, .06, .03, .02)
)

fold_changes <- as.matrix(data.frame(case, "control" = 1))
colnames(fold_changes) <- NULL

set.seed(3220)

lib_sizes <- c(rnorm(20, mean = 1.1, sd = .05),
              rnorm(20, mean = 0.9, sd = .05)
)

# From polyester vignette,
# ~20x coverage "here all transcripts will have ~equal FPKM"
readspertx <- round(20 * width(f) / 100)

simulate_experiment(
  'xstringset.fa',
  fold_changes = fold_changes,
  num_reps = c(20, 20),
  fraglen = 300,
  error_model = "illumina4",
  reads_per_transcript = readspertx,
  # meannodel = TRUE,
  lib_sizes = lib_sizes,
  seed = 3220,

  #size = # use default NULL argument
  outdir = "lo-var",
  cores = 18
)

simulate_experiment(
  'xstringset.fa',
  fold_changes = fold_changes,
  num_reps = c(20, 20),
  fraglen = 300,
  error_model = "illumina4",
  reads_per_transcript = readspertx,
  # meannodel = TRUE,
  lib_sizes = lib_sizes,
  seed = 3220,

  size = 1, # alternative high-variance
  outdir = "hi-var",
  cores = 18
)

```

```

# Note: use branch of kcha/polyester with naive doMC support -- install via:
# devtools::install_github("kcha/polyester", ref =
"545e33c9776db2927f9a22c8c2f5bfde2b3081a7")
library(polyester)
library(Biostrings)
library(foreach)
library(doMC)

# fa = "/home/richardm/bin/STAR-2.5.2/genomes/
Homo_sapiens.GRCh37.dna.primary_assembly.fa"
# gtf = "/home/richardm/bin/STAR-2.5.2/genomes/Homo_sapiens.GRCh37.87.gtf"
# Note: .fa file built using gffread with $fa and $gtf as input, i.e.,
# gffread $gtf -g $fa gffread-GRCh37.87.fasta
# mv gffread-GRCh37.87.fasta gffread-GRCh37.87.fa
fasta = "/home/richardm/bin/STAR-2.5.2/genomes/gffread-GRCh37.87.fa"
f <- readDNAStringSet(fasta)
out <- 'xstringset.fa'
writeXStringSet(f, out)

set.seed(3220)
case <- sample(c(4/1, 2/1, 3/2, 1/1, 2/3, 1/2, 1/4),
              size = length(f),
              replace = TRUE,
              prob = c(.03, .07, .09, .7, .06, .03, .02)
)

fold_changes <- as.matrix(data.frame(case, "control" = 1))
colnames(fold_changes) <- NULL

set.seed(6440)
lib_sizes <- c(rnorm(60, mean = 1.1, sd = .05),
              rnorm(60, mean = 0.9, sd = .05)
)

# From polyester vignette,
# ~20x coverage "here all transcripts will have ~equal FPKM"
readspertx <- round(20 * width(f) / 100)

simulate_experiment(
  'xstringset.fa',
  fold_changes = fold_changes,
  num_reps = c(60, 60),
  fraglen = 300,
  error_model = "illumina4",
  reads_per_transcript = readspertx,
  # meannodel = TRUE,
  lib_sizes = lib_sizes,
  seed = 6440,

  #size = # use default NULL argument
  outdir = "lo-var",
  cores = 15
)

simulate_experiment(
  'xstringset.fa',
  fold_changes = fold_changes,
  num_reps = c(60, 60),
  fraglen = 300,
  error_model = "illumina4",
  reads_per_transcript = readspertx,
  # meannodel = TRUE,
  lib_sizes = lib_sizes,
  seed = 6440,

  size = 1, # alternative high-variance
  outdir = "hi-var",
  cores = 15
)

```

```
library(tximport)
library(EnsDb.Hsapiens.v86)
txdb <- EnsDb.Hsapiens.v86
k <- keys(txdb, keytype = "GENEID")
df <- select(txdb, keys = k, keytype = "GENEID", columns = "TXNAME")
tx2gene <- df[, 2:1] # tx ID, then gene ID

for(i in c("slFMD", "slQuasi", "starsl")){

  print(i)
  files <- list.files(path = i, full.names = TRUE, recursive = TRUE)
  counts.gene <- tximport(files, type = "salmon", tx2gene = tx2gene)
  write.csv(counts.gene, paste0(i, "-tximport.csv"))
}
```

```

#' @param counts A data.frame. The count matrix.
#' @param group A character vector. The labels for each group.
#' @param dir A character vector. The directory in which to save the output.
#' @param txdata A data.frame. The unfiltered truth set provided by polyester.
pipeline.benchmarkDE <- function(counts, group, dir, txdata){

  setwd(dir)

  ### FILTER COUNTS OR NOT
  #
  lapply(list("filter", "nofilter"),
         function(filt){

           if(filt == "filter"){

             keep <- apply(counts, 1, function(x){ sum(x > 10) > ncol(counts)/2
&& !(any(x == 0))})
             write.csv(txdata[rownames(counts[keep, ]), ], "truth-filter.csv")
             ct <- ceiling(as.data.frame(counts[keep, ]))

           }else if(filt == "nofilter"){

             write.csv(txdata[rownames(counts), ], "truth-nofilter.csv")
             ct <- ceiling(as.data.frame(counts))
             ct[ct == 0] <- 1
           }

           ### RUN ALDEx2 ANALYSIS
           #
           lapply(list("malr", "iqlr", "ii1", "ii5", "all"), function(method){

             lapply(list(8, 128), function(mc){

               if(method == "malr"){
                 malr <- which(txdata[rownames(ct),]$foldchange.1 == 1)
                 tt <- ALDEx2::aldex(ct, group, denom = malr, test = "t",
mc.samples = nc)
               }else if(method == "ii1"){
                 tt <- ALDEx2::aldex(ct, group, denom = "iqlr", test = "t",
mc.samples = nc)
                 for(i in 1:1){
                   nonDE.i <- which(rownames(ct) %in% rownames(tt[tt$wi.eBH > .05,
1]))
                   tt <- ALDEx2::aldex(ct, group, denom = nonDE.i, test = "t",
mc.samples = nc)
                 }
               }else if(method == "ii5"){
                 tt <- ALDEx2::aldex(ct, group, denom = "iqlr", test = "t",
mc.samples = nc)
                 for(i in 1:5){
                   nonDE.i <- which(rownames(ct) %in% rownames(tt[tt$wi.eBH > .05,
1]))
                   tt <- ALDEx2::aldex(ct, group, denom = nonDE.i, test = "t",
mc.samples = nc)
                 }
               }else{
                 tt <- ALDEx2::aldex(ct, group, denom = method, test = "t",
mc.samples = nc)
               }

               write.csv(tt, file = paste0(filt, "-", method, "-", mc, "-tt.csv"))

               # Save ALDEx2 MA plot
               #png(paste0(filt, "-", method, "-", nc, "-MA-05.png"))
               #ALDEx2::aldex.plot(tt, type = "MA", cutoff = .05)
               #dev.off()
             })
           })
         })
  #

```

```

###

### RUN edgeR ANALYSIS
#
y <- edgeR::DGEList(counts = ct, group = group)
y <- edgeR::calcNormFactors(y)
y <- edgeR::estimateCommonDisp(y)
y <- edgeR::estimateTagwiseDisp(y)
et <- edgeR::exactTest(y)
tt <- as.data.frame(edgeR::topTags(et, n = nrow(et)))
write.csv(tt, file = paste0(filt, "-edgeR-tt.csv"))

# Save edgeR MA plot
#deGenes <- rownames(tt)[tt$FDR < .05]
#png(paste0(filt, "-edgeR-MA-05.png"))
#edgeR::plotSmear(et, de.tags = deGenes, cex = 0.5)
#dev.off()
#
###

### RUN DESeq2 ANALYSIS
#
frame <- data.frame(group, row.names = colnames(ct))
dds <- DESeq2::DESeqDataSetFromMatrix(countData = ct, colData = frame,
design = ~ group)
dds <- DESeq2::DESeq(dds)
tt <- as.data.frame(DESeq2::results(dds))
tt$padj[is.na(tt$padj)] <- 1
write.csv(tt, file = paste0(filt, "-DESeq2-tt.csv"))

# Save DESeq2 MA plot
#png(paste0(filt, "-DESeq2-MA-05.png"))
#DESeq2::plotMA(dds, alpha = 0.05)
#dev.off()
#
###
})
#
###
}

#' @param dir A character vector. The directory in which to save the output.
pipeline.summarizeDE <- function(dir){

  setwd(dir)

  # Load No-Filter and Filter truth sets
  truth.nofilter <- read.csv("truth-nofilter.csv", row.names = 1)
  truth.filter <- read.csv("truth-filter.csv", row.names = 1)

  files <- list.files(pattern = "*tt")
  observed <- lapply(files, function(f) read.csv(f, row.names = 1))
  names(observed) <- files

  s <- lapply(files, function(f){

    ### SORT RESULTS BASED ON TRUTH SET
    #
    res <- observed[[f]]
    if(grepl("nofilter", f)){ truth <- truth.nofilter
    }else{ truth <- truth.filter }
    res <- res[rownames(truth),]

    if(grepl("edgeR", f)){ padj <- "FDR"
    }else if(grepl("DESeq2", f)){ padj <- "padj"
    }else{ padj <- c("we.eBH", "wi.eBH") }
    #
    ###
  })
}

```

```

### TRY TO CALCULATE SENSITIVITY AND SPECIFICITY
#
lapply(padj, function(m){

  obs <- rownames(res)[res[, m] < .05]
  all <- rownames(truth)
  tru <- rownames(truth)[truth$DEstatus.1]

  x <- all %in% obs
  y <- all %in% tru

  if(sum(x) == 0){

    precision <- NA
    recall <- NA

  }else{

    conf <- table(x, y)
    precision <- conf["TRUE", "TRUE"] / (conf["TRUE", "FALSE"] + conf["TRUE",
"TRUE"])
    recall <- conf["TRUE", "TRUE"] / (conf["FALSE", "TRUE"] + conf["TRUE",
"TRUE"])
  }

  data.frame("b" = basename(getwd()), "f" = f, "m" = m,
            "p" = precision, "r" = recall,
            "all.obs" = nrow(res),
            "all.tru" = nrow(truth),
            "obs" = sum(x),
            "tru" = sum(y))
})
#
###
})

s <- do.call("rbind", lapply(s, function(o) do.call("rbind", o)))
write.csv(s, "summary.csv")
return(s)
}

```

```

#' @param dir A character vector. The directory in which to save the output.
pipeline.summarizeFDR <- function(dir){

```

```

  setwd(dir)

  files <- list.files(pattern = "*tt")
  observed <- lapply(files, function(f) read.csv(f, row.names = 1))
  names(observed) <- files

  s <- lapply(files, function(f){

    ### SET P-VALUE COLUMN(S)
    #
    res <- observed[[f]]

    if(grepl("edgeR", f)){ padj <- "PValue"
  }else if(grepl("DESeq2", f)){ padj <- "pvalue"
  }else{ padj <- c("we.ep", "wi.ep") }
    #
    ###

    ### CALCULATE FDR
    #
    lapply(padj, function(m){

      obs <- sum(res[, m] < .05)
      all <- nrow(res)

```

```
    data.frame("b" = basename(getwd()), "f" = f, "m" = m,  
              "obs" = obs, "all" = all, "fdr" = obs/all)  
  })  
  #  
  ###  
})  
  
s <- do.call("rbind", lapply(s, function(o) do.call("rbind", o)))  
write.csv(s, "summary.csv")  
return(s)  
}
```



```

#####
### INSTALL THESE PACKAGES AND SET WORKING DIRECTORY

#ALDEx2 -- from Bioconductor
#edgeR -- from Bioconductor
#DESeq2 -- from Bioconductor
#testthat
#propr
#plyr
#doMC
library(doMC)
registerDoMC(cores = 30)
wd <- "/home/quinnt/rds-collection-mount/Analysis-Benchmark/bench-simulated-rev/"
`%+%` <- function(a, b) paste0(a, b)
source(wd +% "1-bench-pipeline.R")
NFEATS <- 10000
NBOOTS <- 20

#####
### DELETE THESE AFTER DE-BUGGING

#registerDoMC(cores = 2)
#wd <- "/home/thom/Downloads/bench-simulated-rev/"
#source(wd +% "1-bench-pipeline.R")
#NFEATS <- 100
#NBOOTS <- 3

#####
### RUN THE FOLLOWING AS IS -- IMPORT DATA

setwd(wd)

groupdata <- read.table(wd +% "sim_info/sim_rep_info.txt", stringsAsFactors =
FALSE)
groupdata$rep_id <- make.names(groupdata$rep_id, unique = TRUE)
group1 <- which(groupdata$group == 1)
group2 <- which(groupdata$group == 2)

txdata <- read.table("sim_info/sim_tx_info.txt", stringsAsFactors = FALSE)
rows.clean <- unlist(lapply(strsplit(txdata[,1], "\\s"), function(x) x[1]))
rownames(txdata) <- rows.clean

# Step through transcript-level files (i.e., not stst)
files <- list.files("sim_counts", full.names = TRUE)
index.sim <- grepl("sim_", basename(files)) & !grepl("stst_", basename(files))
files <- files[index.sim]

# Force equivalent row order
counts <- lapply(files, function(x) read.csv(x, row.names = 1))
all(rownames(counts[[1]]) %in% rownames(txdata))
counts <- lapply(counts, function(x) x[rownames(txdata), ])
names(counts) <- gsub(".csv", "", basename(files))

for(i in 1:length(counts)){
  colnames(counts[[i]]) <- gsub("_quant.sf", "", colnames(counts[[i]]))
  if(!all(colnames(counts[[i]]) %in% groupdata$rep_id)) stop()
  counts[[i]] <- counts[[i]][, groupdata$rep_id]
}

for(i in 1:length(counts)){
  for(j in 1:length(counts)){
    testthat::expect_equal(
      nrow(counts[[i]]),
      nrow(counts[[j]])
    )
  }
}

for(i in 1:length(counts)){

```

```

    for(j in 1:length(counts)){
      testthat::expect_equal(
        colnames(counts[[i]]),
        colnames(counts[[j]])
      )
    }
  }
}

for(i in 1:length(counts)){
  for(j in 1:length(counts)){
    testthat::expect_equal(
      rownames(counts[[i]]),
      rownames(counts[[j]])
    )
  }
}
}

#####
### RUN THE FOLLOWING AS IS -- BENCHMARK METHODS

grid <- expand.grid('file' = gsub(".csv", "", basename(files)),
                  "N" = c(2, 3, 5, 10, 20),
                  stringsAsFactors = FALSE)
foreach(i = 1:nrow(grid)) %dopar% {

  # Set directory to bench-simulated-rev/file/N
  setwd(wd)
  system("mkdir " %+% grid[i, "file"])
  dir <- paste(grid[i,], collapse = "/")
  system("mkdir " %+% dir)
  setwd(wd %+% dir)

  p <- lapply(1:NBOOTS, function(b){

    # Set directory to bench-simulated-rev/file/N/b
    setwd(wd %+% dir)
    system("mkdir " %+% b)
    setwd(wd %+% dir %+% "/" %+% b)

    f <- grid[i, "file"]
    n <- grid[i, "N"]

    set.seed(b)
    sample.tx <- sample(rownames(txdata), NFEATS) # character
    sample.g1 <- sample(group1, n) # numeric
    sample.g2 <- sample(group2, n) # numeric

    counts.b <- counts[[f]][sample.tx, c(sample.g1, sample.g2)]
    group.b <- c(rep("A", n), rep("B", n))

    pipeline.benchmarkDE(counts.b, group.b, getwd(), txdata)
    pipeline.summarizedE(getwd())
  })

  setwd(wd %+% dir)
  p <- do.call("rbind", p)
  p <- suppressWarnings(cbind(grid[i,], p))
  write.csv(p, file = "performances.csv")
}

setwd(wd)
p <- list.files(pattern = "performances.csv", recursive = TRUE, full.names = TRUE)
p <- lapply(p, read.csv)
p <- do.call("rbind", p)
write.csv(p, "bench-simulated-rev-OUT.csv")

```

```

#####
### INSTALL THESE PACKAGES AND SET WORKING DIRECTORY

#ALDEx2 -- from Bioconductor
#edgeR -- from Bioconductor
#DESeq2 -- from Bioconductor
#testthat
#propr
#plyr
#doMC
library(doMC)
registerDoMC(cores = 8)
wd <- "/home/quinnt/rds-collection-mount/Analysis-Benchmark/bench-simulated-fdr/"
`%+%` <- function(a, b) paste0(a, b)
source(wd +% "1-bench-pipeline.R")
NFEATS <- 10000
NBOOTS <- 5

#####
### DELETE THESE AFTER DE-BUGGING

#registerDoMC(cores = 2)
#wd <- "/home/thom/Downloads/bench-simulated-fdr/"
#source(wd +% "1-bench-pipeline.R")
#NFEATS <- 100
#NBOOTS <- 3

#####
### RUN THE FOLLOWING AS IS -- IMPORT DATA

setwd(wd)

groupdata <- read.table(wd +% "sim_info/sim_rep_info.txt", stringsAsFactors =
FALSE)
groupdata$rep_id <- make.names(groupdata$rep_id, unique = TRUE)
group1 <- which(groupdata$group == 1)
group2 <- which(groupdata$group == 2)

txdata <- read.table("sim_info/sim_tx_info.txt", stringsAsFactors = FALSE)
rows.clean <- unlist(lapply(strsplit(txdata[,1], "\\s"), function(x) x[1]))
rownames(txdata) <- rows.clean

# Step through transcript-level files (i.e., not stst)
files <- list.files("sim_counts", full.names = TRUE)
index.sim <- grepl("sim_", basename(files)) & !grepl("stst_", basename(files))
files <- files[index.sim]

# Force equivalent row order
counts <- lapply(files, function(x) read.csv(x, row.names = 1))
all(rownames(counts[[1]]) %in% rownames(txdata))
counts <- lapply(counts, function(x) x[rownames(txdata), ])
names(counts) <- gsub(".csv", "", basename(files))

for(i in 1:length(counts)){
  colnames(counts[[i]]) <- gsub("_quant.sf", "", colnames(counts[[i]]))
  if(!all(colnames(counts[[i]]) %in% groupdata$rep_id)) stop()
  counts[[i]] <- counts[[i]][, groupdata$rep_id]
}

for(i in 1:length(counts)){
  for(j in 1:length(counts)){
    testthat::expect_equal(
      nrow(counts[[i]]),
      nrow(counts[[j]])
    )
  }
}

for(i in 1:length(counts)){

```

```

    for(j in 1:length(counts)){
      testthat::expect_equal(
        colnames(counts[[i]]),
        colnames(counts[[j]])
      )
    }
  }
}

for(i in 1:length(counts)){
  for(j in 1:length(counts)){
    testthat::expect_equal(
      rownames(counts[[i]]),
      rownames(counts[[j]])
    )
  }
}

#####
### RUN THE FOLLOWING AS IS -- BENCHMARK METHODS

grid <- expand.grid('file' = gsub(".csv", "", basename(files)),
                  "N" = c(2, 3, 5, 10, 20),
                  stringsAsFactors = FALSE)
foreach(i = 1:nrow(grid)) %dopar% {

  # Set directory to bench-simulated-rev/file/N
  setwd(wd)
  system("mkdir " %+% grid[i, "file"])
  dir <- paste(grid[i,], collapse = "/")
  system("mkdir " %+% dir)
  setwd(wd %+% dir)

  p <- lapply(1:NBOOTS, function(b){

    # Set directory to bench-simulated-rev/file/N/b
    setwd(wd %+% dir)
    system("mkdir " %+% b)
    setwd(wd %+% dir %+% "/" %+% b)

    f <- grid[i, "file"]
    n <- grid[i, "N"]

    # ALL SAMPLES COME FROM SAME GROUP
    set.seed(b)
    sample.tx <- sample(rownames(txdata), NFEATS) # character
    sample.g1 <- sample(group1, n * 2) # numeric
    #sample.g2 <- sample(group2, n) # numeric

    counts.b <- counts[[f]][sample.tx, c(sample.g1)]
    group.b <- c(rep("A", n), rep("B", n))

    pipeline.benchmarkDE(counts.b, group.b, getwd(), txdata)
    pipeline.summarizeFDR(getwd())
  })

  setwd(wd %+% dir)
  p <- do.call("rbind", p)
  p <- suppressWarnings(cbind(grid[i,], p))
  write.csv(p, file = "performances.csv")
}

setwd(wd)
p <- list.files(pattern = "performances.csv", recursive = TRUE, full.names = TRUE)
p <- lapply(p, read.csv)
p <- do.call("rbind", p)
write.csv(p, "bench-simulated-fdr-OUT.csv")

```

```

#####
### LOCATION OF FILE DEPENDENCIES

library(doMC)
registerDoMC(cores = 5) # only need 5 cores

# Working directory containing "counts/gene" and "counts/tx" folders:
wd <- "/home/quinnt/rds-collection-mount/Analysis-Benchmark/bench-williams-rev/"

# Conversion table (from Williams 2017):
convertTable <- "conversion_tgs.txt"

# Microarray reference (from Williams 2017):
microarrayReference <- "12859_2016_1457_MOESM2_ESM.xlsx"

# Use meta-data to assign group labels (from Williams 2017):
meta <- read.delim("bench-williams-meta.txt")
grp <- substr(as.character(meta$Library_Name_s), 1, 3)

# Figure table (from Williams 2017):
fig.file <- "12859_2016_1457_MOESM6_ESM.xlsx"

#####
### FUNCTIONS USED FOR BENCHMARKING

#' Read Gene Expression Data Files
#'
#' This function (a) reads in gene expression data files and
#' (b) ensures equivalent row and column names.
#'
#' NOTE: Remove 1:5000 subset later
getCounts <- function(files){

  # Read files into R
  counts <- lapply(files, function(x) read.csv(x, row.names = 1))

  # Special handling for tximport data
  counts <- lapply(counts, function(x){
    if(any(grepl("counts\\.\"", colnames(x)))){
      x[, grepl("counts\\.\"", colnames(x))]
    }else{
      x
    }
  })

  # Ensure all data sets have the same feature names
  feats.int <- rownames(counts[[1]])
  for(i in 1:length(counts)){
    feats.int <- intersect(feats.int, rownames(counts[[i]]))
  }
  counts <- lapply(counts, function(x) x[feats.int, ])

  # # Remove later
  #set.seed(1)
  #short <- sample(nrow(counts[[1]]))[1:5000]
  #counts <- lapply(counts, function(x) x[short,])

  for(i in 1:length(counts)){
    for(j in 1:length(counts)){
      testthat::expect_equal(
        nrow(counts[[i]]),
        nrow(counts[[j]])
      )
    }
  }

  for(i in 1:length(counts)){
    for(j in 1:length(counts)){
      testthat::expect_equal(

```

```

        ncol(counts[[i]]),
        ncol(counts[[j]])
      )
    }
  }

  for(i in 1:length(counts)){
    for(j in 1:length(counts)){
      testthat::expect_equal(
        rownames(counts[[i]]),
        rownames(counts[[j]])
      )
    }
  }

  return(counts)
}

#' Run edgeR as per Williams 2017
edgeR.williams <- function(expMat, group, method){

  library(edgeR)

  y<-DGEList(counts=expMat,group=group)
  y<-calcNormFactors(y)

  # Filter for counts present in half the samples, on cpm data
  cutoff<-ncol(expMat)/2
  keep <- rowSums(cpm(y)>1) >= cutoff
  y <- y[keep, , keep.lib.sizes=FALSE]

  ## Recalculate norm factors after filtering
  y<-calcNormFactors(y)

  y<-estimateCommonDisp(y)
  y<-estimateTagwiseDisp(y)
  et<-exactTest(y)
  adjp<-topTags(et,n=nrow(y))

  return(adjp)
}

#' Run DESeq2 as per Williams 2017
DESeq2.williams <- function(expMat, group, method){

  # DESeq2 requires integer input
  expMat <- ceiling(as.data.frame(expMat))

  frame <- data.frame(group, row.names = colnames(expMat))
  dds <- DESeq2::DESeqDataSetFromMatrix(countData = expMat, colData = frame,
design = ~ group)
  dds <- DESeq2::DESeq(dds)
  tt <- as.data.frame(DESeq2::results(dds))
  tt$padj[is.na(tt$padj)] <- 1

  colnames(tt)[colnames(tt) == "padj"] <- "FDR"

  return(tt)
}

#' Run ALDEx2
#'
#' Uses 'wi.eBH' as the "FDR" column
ALDEx2.williams <- function(ct, group, method){

  ct[ct == 0] <- 1
  ct <- ceiling(as.data.frame(ct))

  if(method == "iil"){

```

```

    tt <- ALDEx2::aldex(ct, group, denom = "iqlr", test = "t", nc.samples = 128,
effect = FALSE)
    for(i in 1:1){
      nonDE.i <- which(rownames(ct) %in% rownames(tt[tt$wi.eBH > .05, ]))
      tt <- ALDEx2::aldex(ct, group, denom = nonDE.i, test = "t", mc.samples =
128, effect = FALSE)
    }
  }else if(method == "ii5"){
    tt <- ALDEx2::aldex(ct, group, denom = "iqlr", test = "t", nc.samples = 128,
effect = FALSE)
    for(i in 1:5){
      nonDE.i <- which(rownames(ct) %in% rownames(tt[tt$wi.eBH > .05, ]))
      tt <- ALDEx2::aldex(ct, group, denom = nonDE.i, test = "t", mc.samples =
128, effect = FALSE)
    }
  }else{
    tt <- ALDEx2::aldex(ct, group, denom = method, test = "t", nc.samples = 128,
effect = FALSE)
  }

  # Use wi.eBH column for FDR
  #ALDEx2::aldex.plot(tt, type = "MW", cutoff = .05)
  colnames(tt)[colnames(tt) == "wi.eBH"] <- "FDR"

  return(tt)
}

#' Convert ENSG and/or ENST to Symbol
#'
#' Uses 'conversionTable' as provided by cckim47.
convertToSymbol <- function(adjp, conversionTable){

  if(all(grepl("ENSG", rownames(adjp)))){
    compType <- "gene"
    message("Converting gene ID to SYMBOL.")
  }else{
    compType <- "tx"
    message("Converting transcript ID to SYMBOL.")
  }

  ## Merge gene name information into results
  if(compType == "gene"){
    resSymbol<-merge(adjp,conversionTable[,c("ENSG","geneName")],
by.x="row.names", by.y="ENSG")
    colnames(resSymbol) = c("ENSG",colnames(resSymbol[2:length(resSymbol)]))
  } else{
    resSymbol<-merge(adjp,conversionTable, by.x="row.names", by.y="ENST")
    colnames(resSymbol) = c("ENST",colnames(resSymbol[2:length(resSymbol)]))
  }

  return(resSymbol)
}

#' Get Gene Universe for Microarray Reference
#'
#' We must filter gene symbols through the intersection
#' of the RNA-Seq and microarray data sets. This changes
#' for each microarray reference!
getUniverse <- function(id, rnaseqset){

  library(AnnotationDbi)

  # lapply(c('int-Frank', 'intHaniffa', 'int-Ingersoll', 'int-Wong')
if(id == 1){ # int-Frank

  message("int-Frank")
  # GPL570 [HG-U133_Plus_2] Affymetrix Human Genome U133 Plus 2.0 Array
  library(hgu133plus2.db)
  db <- hgu133plus2.db

```



```

}else if(id == 2){ # int-Haniffa

  message("int-Haniffa")
  # GPL10558 Illumina HumanHT-12 V4.0 expression beadchip
  library(illuminaHumanv4.db)
  db <- illuminaHumanv4.db

}else if(id == 3){ # int-Ingersoll

  message("int-Ingersoll")
  # GPL570 [HG-U133_Plus_2] Affymetrix Human Genome U133 Plus 2.0 Array
  library(hgu133plus2.db)
  db <- hgu133plus2.db

}else if(id == 4){ # int-Wong

  message("int-Wong")
  # GPL6102 Illumina human-6 v2.0 expression beadchip
  library(illuminaHumanv2.db)
  db <- illuminaHumanv2.db
}

x <- select(db, keys = keys(db, "PROBEID"), column = "SYMBOL", keytype =
"PROBEID")
microarrayset <- unique(x[!is.na(x$SYMBOL), "SYMBOL"])
message("Microarray contains:", length(unique(microarrayset)))
message("RNA-Seq contains:", length(unique(rnaseqset)))
i <- intersect(microarrayset, rnaseqset)
message("Intersection:", length(unique(i)))

return(i)
}

pipeline <- function(counts, grp, func, method, title){

# (1) Run DE analyses
de <- lapply(counts, func, group = grp, method = method)

# (2) Use Conversion table to Convert to common names
conversionTable <- read.table(convertTable, header = TRUE)
de.symbol <- lapply(de, convertToSymbol, conversionTable = conversionTable)

# (3) Pull in microarray reference (i.e., genes selected as significant)
sheets <- c("int-Frank", "int-Haniffa", "int-Ingersoll", "int-Wong")
intersects <- lapply(sheets,
  function(s) as.data.frame(
    readxl::read_excel(microarrayReference, sheet = s))[,1])

# (4) Precision and recall -- for each microarray reference
# (4.a) Filter microarray reference and RNA-Seq
# "we first filtered each reference and
# RNA-Seq gene set to include only features measurable
# both by RNA-Seq (i.e., present in the GRCh37 genome
# release) and by the microarray (i.e., a probe targeting the
# feature was present on the microarray platform) within a
# given comparison"
out <- lapply(de.symbol, function(de){

# For each RNA-Seq data set, move through each microarray data set...
lapply(1:length(intersects), function(i){

# MUST FILTER BEFORE PULLING OUT SIGNIFICANT SYMBOLS
# Get i-th microarray gene universe
UNIONSET <- getUniverse(i, rnaseqset = de[, "geneName"])

# PULL OUT SIGNIFICANT SYMBOLS
sigSymbols <- function(x, col.fdr = "FDR", col.symbol = "geneName"){
  as.character(unique(x[x[, col.fdr] < .05, col.symbol]))
}

```



```

    }
    de.fdr <- sigSymbols(de, col.fdr = "FDR", col.symbol = "geneName")
    message("Total probes:", nrow(de))
    message("FDR probes:", length(de.fdr))

    ref <- intersects[[i]]
    l <- list(
      'de.fdr' = de.fdr[de.fdr %in% UNIONSET],
      'ref' = ref[ref %in% UNIONSET]
    )
  })
})

# (4.b) Calculate precision and recall for each microarray reference
# "Recall was calculated as the number of signifi-
# cant genes in the intersection of the test RNA-Seq dataset
# with the reference dataset, divided by the number of genes
# identified as significant in the reference dataset."
# "Precision was calculated as the number of significant genes in the
# intersection of the test RNA-Seq dataset with the refer-
# ence dataset, divided by the number of genes identified as
# significant in the test RNA-Seq dataset."
precision <-
  lapply(out,
    function(o) sapply(o, function(x) length(intersect(x[["de.fdr"]], x
[["ref"]])) / length(x[["de.fdr"]]))))
recall <-
  lapply(out,
    function(o) sapply(o, function(x) length(intersect(x[["de.fdr"]], x
[["ref"]])) / length(x[["ref"]]))))

# (4.c) Average precision and recall
# "Here, we have depicted
# our results using performance metrics averaged across all
# four references;"
precision.mean <- lapply(precision, mean)
recall.mean <- lapply(recall, mean)

# Compile data
data.frame(
  file = c(files.gene, files.tx),
  DE = title,
  type = sapply(counts, function(x) ifelse(grepl('ENSG', rownames(x)[1]),
"gene", "tx")),
  FrankPrecision = sapply(precision, function(x) x[1]),
  HaniffaPrecision = sapply(precision, function(x) x[2]),
  IngersollPrecision1 = sapply(precision, function(x) x[3]),
  WongPrecision = sapply(precision, function(x) x[4]),
  AveragePrecision = unlist(precision.mean),
  FrankRecall = sapply(recall, function(x) x[1]),
  HaniffaRecall = sapply(recall, function(x) x[2]),
  IngersollRecall = sapply(recall, function(x) x[3]),
  WongRecall = sapply(recall, function(x) x[4]),
  AverageRecall = unlist(recall.mean)
)
}

#####
### RUN THIS AS-IS

files.gene <- list.files("counts/gene", full.names = TRUE)
files.tx <- list.files("counts/tx", full.names = TRUE)
counts <- c(getCounts(files.gene), getCounts(files.tx))

foreach(run = 1:5) %dopar% {
  # if(run == 1){
  #
  #   out.edgeR <- pipeline(counts, grp, edgeR.williams, title = "edgeR")
  #   write.csv(out.edgeR, "bench-edgeR.csv")

```

```
# }
# if(run == 2){
#
#   out.clr <- pipeline(counts, grp, ALDEx2.williams, title = "clr", method =
"clr")
#   write.csv(out.clr, "bench-clr.csv")
# }
# if(run == 3){
#
#   out.iqlr <- pipeline(counts, grp, ALDEx2.williams, title = "iqlr", method =
"iqlr")
#   write.csv(out.iqlr, "bench-iqlr.csv")
# }
# if(run == 4){
#
#   out.iil <- pipeline(counts, grp, ALDEx2.williams, title = "iil", method =
"iil")
#   write.csv(out.iil, "bench-iil.csv")
# }
if(run == 5){

  out.DESeq2 <- pipeline(counts, grp, DESeq2.williams, title = "DESeq2")
  write.csv(out.DESeq2, "bench-DESeq2.csv")
}
}
```

```

df <- read.csv(
  "/home/thom/Dropbox/R/projects/manuscripts/benchmark/1-sims/bench-simulated-rev-
OUT.csv",
  stringsAsFactors = FALSE
)

df$filter <- unlist(lapply(strsplit(df$f, "-"), function(x) x[1]))
df$method <- unlist(lapply(strsplit(df$f, "-"), function(x) x[2]))
df$method <- ifelse(df$method == "all", "clr", df$method)
df$method <-
  factor(df$method,
    levels = c("edgeR", "DESeq2", "clr", "iqlr", "malr", "ii1", "ii5"))
df$mc <- unlist(lapply(strsplit(df$f, "-"), function(x) x[3]))
df$data <- unlist(lapply(strsplit(df$file, "_"), function(x) x[2]))
df$process <- unlist(lapply(strsplit(df$file, "_")(out)), function(x) x[3]))

# (A) Statistical tests for filter, mc, m, etc.

# across 3000 - 20 B, 5 n, 3 proc, 2 filters, and 5 lrs
t.test(df[df$data == "lv" & df$m == "we.eBH" & df$mc == 8, "r"],
  df[df$data == "lv" & df$m == "we.eBH" & df$mc == 128, "r"])
t.test(df[df$data == "lv" & df$m == "we.eBH" & df$mc == 8, "p"],
  df[df$data == "lv" & df$m == "we.eBH" & df$mc == 128, "p"])

# across 3000 - 20 B, 5 n, 3 proc, 2 , ncs, and 5 lrs
t.test(df[df$data == "lv" & df$m == "we.eBH" & df$filter == "filter", "r"],
  df[df$data == "lv" & df$m == "we.eBH" & df$filter == "nofilter", "r"])
t.test(df[df$data == "lv" & df$m == "we.eBH" & df$filter == "filter", "p"],
  df[df$data == "lv" & df$m == "we.eBH" & df$filter == "nofilter", "p"])

# across 300 - 20 B, 5 n, 3 proc
t.test(df[df$data == "lv" & df$method == "edgeR" & df$filter == "filter", "r"],
  df[df$data == "lv" & df$method == "edgeR" & df$filter == "nofilter", "r"])
t.test(df[df$data == "lv" & df$method == "edgeR" & df$filter == "filter", "p"],
  df[df$data == "lv" & df$method == "edgeR" & df$filter == "nofilter", "p"])

# across 300 - 20 B, 5 n, 3 proc
t.test(df[df$data == "lv" & df$method == "DESeq2" & df$filter == "filter", "r"],
  df[df$data == "lv" & df$method == "DESeq2" & df$filter == "nofilter", "r"])
t.test(df[df$data == "lv" & df$method == "DESeq2" & df$filter == "filter", "p"],
  df[df$data == "lv" & df$method == "DESeq2" & df$filter == "nofilter", "p"])

# across 60 - 20 B, 3 proc
lv <- df[df$data == "lv" & df$m != "we.eBH" & df$filter == "nofilter" & df$mc !=
8,]
library(plyr)
pval <- ldply(unique(lv$N), function(n){
  ldply(unique(lv$method), function(m1){
    ldply(unique(lv$method), function(m2){

      if(m1 != m2){

        a <- lv[lv$N == n & lv$method == m1, "p"]
        b <- lv[lv$N == n & lv$method == m2, "p"]
        pp <- tryCatch(t.test(a, b)$p.value, error = function(e) return(NA))

        a <- lv[lv$N == n & lv$method == m1, "r"]
        b <- lv[lv$N == n & lv$method == m2, "r"]
        rp <- tryCatch(t.test(a, b)$p.value, error = function(e) return(NA))

        data.frame(n, m1, m2, pp, rp)
      }
    })
  })
})

# across 210 - 7 methods, 6 methods, 5 n
pval[pval$n == 5,]
pval[pval$n == 10,]

```

```

pval[pval$n == 20,]

# (B) Pre-process data for plots

df.prec <- df$p
df.reca <- df$r
df <- rbind(df, df)
df$Amount <- c(df.prec, df.reca)
df$Type <- c(rep("Precision", nrow(df)/2), rep("Recall", nrow(df)/2))

# (C) Prepare plot functions

pDEMethod <- function(df, title){
  ggplot(data = df, aes(x = method, y = Amount, color = as.factor(method))) +
    geom_boxplot() + facet_grid(Type ~ N) +
    theme_bw() + ylin(0, 1) +
    xlab("Differential Expression (DE) Method") + ylab("Performance") +
    labs(color = "DE Method") +
    scale_colour_brewer(palette = "Set1") +
    ggtitle(title) +
    geom_hline(data = df[df$Type == "Precision",], aes(yintercept = .95)) +
    theme(axis.text.x = element_text(angle = 90, hjust = 1))
}

pProcess <- function(df, title){
  ggplot(data = df, aes(x = method, y = Amount, color = as.factor(N))) +
    geom_point() + facet_grid(Type ~ process) +
    theme_bw() + ylin(0, 1) +
    xlab("Differential Expression (DE) Method") + ylab("Performance") +
    labs(color = "Sample Size") +
    scale_colour_brewer(palette = "Set1") +
    ggtitle(title) +
    geom_hline(data = df[df$Type == "Precision",], aes(yintercept = .95)) +
    theme(axis.text.x = element_text(angle = 90, hjust = 1))
}

# (D) Plot wi.eBH data

library(ggplot2)

###
# FIGURE 1:
jpeg("/home/thon/Dropbox/R/projects/manuscripts/benchmark/1-sims/fig1.jpg",
      width = 10, height = 10, units = "in", res = 600)
pDEMethod(df[df$m != "we.eBH" & df$mc != 8 & df$filter == "nofilter" & df$data ==
"lv",],
          "Differential Expression Performance using a Simulated Reference (Low
Variance Data)")
dev.off()

###
# FIGURE 2:
jpeg("/home/thon/Dropbox/R/projects/manuscripts/benchmark/1-sims/fig2.jpg",
      width = 10, height = 10, units = "in", res = 600)
pProcess(df[df$n != 'we.eBH' & df$mc != 8 & df$filter == "nofilter" & df$data ==
"lv",],
         "Differential Expression Performance using a Simulated Reference (Low
Variance Data)")
dev.off()

###
# FIGURE 3:
jpeg("/home/thon/Dropbox/R/projects/manuscripts/benchmark/1-sims/fig3.jpg",
      width = 10, height = 10, units = "in", res = 600)
pDEMethod(df[df$m != "we.eBH" & df$mc != 8 & df$filter == "nofilter" & df$data ==
"hv",],
          "Differential Expression Performance using a Simulated Reference (High
Variance Data)")
dev.off()

```

```
# (E) Plot wi.eBH data

###
# SUPP 1:
jpeg("/home/thon/Dropbox/R/projects/manuscripts/benchmark/1-sims/sup1.jpg",
      width = 10, height = 10, units = "in", res = 600)
pDEMethod(df[df$m != "wi.eBH" & df$mc != 8 & df$filter == "nofilter" & df$data ==
"lv",],
          "Differential Expression Performance using a Simulated Reference (Low
Variance Data) [we.eBH column]")
dev.off()

###
# SUPP 2:
jpeg("/home/thon/Dropbox/R/projects/manuscripts/benchmark/1-sims/sup2.jpg",
      width = 10, height = 10, units = "in", res = 600)
pProcess(df[df$m != "wi.eBH" & df$mc != 8 & df$filter == "nofilter" & df$data ==
"lv",],
         "Differential Expression Performance using a Simulated Reference (Low
Variance Data) [we.eBH column]")
dev.off()

###
# SUPP 3:
jpeg("/home/thon/Dropbox/R/projects/manuscripts/benchmark/1-sims/sup3.jpg",
      width = 10, height = 10, units = "in", res = 600)
pDEMethod(df[df$m != "wi.eBH" & df$mc != 8 & df$filter == "nofilter" & df$data ==
"hv",],
          "Differential Expression Performance using a Simulated Reference (High
Variance Data) [we.eBH column]")
dev.off()
```

```

df <- read.csv(
  "/home/thom/Dropbox/R/projects/manuscripts/benchmark/2-fdr/bench-simulated-fdr-
OUT.csv",
  stringsAsFactors = FALSE
)

df$fdr[is.na(df$fdr)] <- 0
df$filter <- unlist(lapply(strsplit(df$f, "-"), function(x) x[1]))
df$method <- unlist(lapply(strsplit(df$f, "-"), function(x) x[2]))
df$method <- ifelse(df$method == "all", "clr", df$method)
df$method <-
  factor(df$method,
    levels = c('edgeR', "DESeq2", 'clr', 'iqlr', "malr", "ii1", "ii5"))
df$mc <- unlist(lapply(strsplit(df$f, "-"), function(x) x[3]))
df$data <- unlist(lapply(strsplit(df$file, "_"), function(x) x[2]))
df$process <- unlist(lapply(strsplit(df$file, "_|(out)"), function(x) x[3]))
df <- df[df$mc != "we.iBH" & df$mc != 8 & df$filter == "nofilter",]

jpeg("/home/thom/Dropbox/R/projects/manuscripts/benchmark/2-fdr/sup4.jpg",
  width = 10, height = 10, units = "in", res = 600)
library(ggplot2)
ggplot(df[df$data == "lv",], aes(x = method, y = fdr, color = method)) +
  geom_boxplot() +
  facet_grid(N ~ process) + theme_bw() +
  xlab("Differential Expression (DE) Method") +
  ylab("False Discovery Rate\n(for 5 simulations)") +
  labs(color = "DE Method") +
  scale_colour_brewer(palette = "Set1") +
  ggtitle("False Discovery Rates for DE Method (Low Variance Data)") +
  geom_hline(yintercept = .05) +
  theme(axis.text.x = element_text(angle = 90, hjust = 1))
dev.off()

jpeg("/home/thom/Dropbox/R/projects/manuscripts/benchmark/2-fdr/sup5.jpg",
  width = 10, height = 10, units = "in", res = 600)
library(ggplot2)
ggplot(df[df$data == "hv",], aes(x = method, y = fdr, color = method)) +
  geom_boxplot() +
  facet_grid(N ~ process) + theme_bw() +
  xlab("Differential Expression (DE) Method") +
  ylab("False Discovery Rate\n(for 5 simulations)") +
  labs(color = "DE Method") +
  scale_colour_brewer(palette = "Set1") +
  ggtitle("False Discovery Rates for DE Method (High Variance Data)") +
  geom_hline(yintercept = .05) +
  theme(axis.text.x = element_text(angle = 90, hjust = 1))
dev.off()

```

```

setwd("/home/thom/Dropbox/R/projects/manuscripts/benchmark/3-williams/")
files <- list.files(pattern = "bench.*csv")
f <- lapply(files, read.csv)
will <- do.call("rbind", f)
will <- will[, -1]
colnames(will)[1:3] <- c("InputFile", "DEmethod", "Type")
write.csv(as.matrix(will), file = "will-clean.csv")

# Recreate figure from Williams et al.
# -- [, c(3, 4)] is gene-wise R/P; [, c(7, 8)] is tx-wise R/P
file <- "/home/thom/Dropbox/R/projects/manuscripts/benchmark/3-williams/12859_2016_1457_MOESM6_ESM.xlsx"
measures <- lapply(c(3, 4, 7, 8), function(x) readxl::read_excel(file, sheet = x))
fig.data <- plyr::rbind.fill(
  cbind('type' = "gene", merge(measures[[1]], measures[[2]])),
  cbind('type' = "tx", merge(measures[[3]], measures[[4]]))
)
colnames(fig.data) <- gsub("\\s", "", colnames(fig.data))

fig.data <- fig.data[, c('type', "DE", "AveragePrecision", "AverageRecall")]
fig.data$Process <- 'Data from \nWilliams et al.\n(2017)'\n
fig.data$alpha <- .9
fig.data$DE <- 'Data from \nWilliams et al.\n(2017)'\n

new <- read.csv("/home/thom/Dropbox/R/projects/manuscripts/benchmark/3-williams/will-clean.csv",
               stringsAsFactors = FALSE)
new$Process <- sapply(new$InputFile, function(x) strsplit(x, split = "/|_|-')[[1]][3])
new$Process[new$Process == "starsl"] <- "stsl"
new$Process[new$Process == "slQuasi"] <- "slQUASI"
fig.new <- new[, c("Type", "DEmethod", "AveragePrecision", "AverageRecall", "Process")]
fig.new$alpha <- 1
colnames(fig.new) <- colnames(fig.data)
fig <- rbind(fig.data, fig.new)
fig$DE <-
  factor(fig$DE,
         levels = c('edgeR', "DESeq2", 'clr', 'iqlr', "malr", "iil",
                    'Data from \nWilliams et al.\n(2017)'))
fig$type <- ifelse(fig$type == "tx", "Transcript-level", "Gene-level")
fig$Process <-
  factor(fig$Process,
         levels = c('slFMD', "slQUASI", "stsl", "stst",
                    'Data from \nWilliams et al.\n(2017)'))

jpeg("/home/thom/Dropbox/R/projects/manuscripts/benchmark/3-williams/fig4.jpg",
     width = 10, height = 10, units = "in", res = 600)
library(ggplot2)
ggplot(data = fig, aes(x = AverageRecall, y = AveragePrecision)) +
  facet_grid(type ~ .) +
  geom_point(aes(color = DE, alpha = alpha, shape = Process), size = 3) +
  xlim(0, 1) + ylim(0, .5) +
  theme_bw() +
  xlab("Recall (Average Across Microarray References)") +
  ylab("Precision (Average Across Microarray References)") +
  scale_alpha_continuous(guide = FALSE) +
  labs(color = "DE Method",
       shape = "Process Method") +
  scale_colour_brewer(palette = "Set1") +
  ggtitle("Differential Expression Performance using a Microarray Reference")
dev.off()

```



```

setwd("/home/thom/Dropbox/R/projects/nanuscpts/")

#####
# funcs
#####

edgeR.williams <- function(expMat, group, method){
  library(edgeR)
  y<-DGEList(counts=expMat,group=group)
  y<-calcNormFactors(y)
  # Filter for counts present in half the samples, on cpn data
  cutoff<-ncol(expMat)/2
  keep <- rowSums(cpn(y)>1) >= cutoff
  y <- y[keep, , keep.lib.sizes=FALSE]
  ## Recalculate norm factors after filtering
  y<-calcNormFactors(y)
  y<-estimateCommonDisp(y)
  y<-estimateTagwiseDisp(y)
  et<-exactTest(y)
  adjp<-topTags(et,n=nrow(y))
  return(adjp)
}

# NOTE: differs from other ALDEx2.williams function in that effect = TRUE!!
ALDEx2.williams <- function(ct, group, method){
  ct[ct == 0] <- 1
  ct <- ceiling(as.data.frame(ct))
  if(method == "ii1"){
    tt <- ALDEx2::aldex(ct, group, denom = "iqlr", test = "t", nc.samples = 128,
      effect = TRUE)
    for(i in 1:1){
      nonDE.i <- which(rownames(ct) %in% rownames(tt[tt$wi.eBH > .05, ]))
      tt <- ALDEx2::aldex(ct, group, denom = nonDE.i, test = "t", mc.samples =
        128, effect = TRUE)
    }
  }else if(method == "ii5"){
    tt <- ALDEx2::aldex(ct, group, denom = "iqlr", test = "t", nc.samples = 128,
      effect = TRUE)
    for(i in 1:5){
      nonDE.i <- which(rownames(ct) %in% rownames(tt[tt$wi.eBH > .05, ]))
      tt <- ALDEx2::aldex(ct, group, denom = nonDE.i, test = "t", mc.samples =
        128, effect = TRUE)
    }
  }else{
    tt <- ALDEx2::aldex(ct, group, denom = method, test = "t", nc.samples = 128,
      effect = TRUE)
  }
  # Use wi.eBH column for FDR
  #ALDEx2::aldex.plot(tt, type = "MW", cutoff = .05)
  colnames(tt)[colnames(tt) == "wi.eBH"] <- "FDR"
  return(tt)
}

#####
# import
#####

ct.fmd <- read.csv("benchmark/4-rollins/ctslFMD_counts.csv",
  row.names = 1)
ct.quasi <- read.csv("benchmark/4-rollins/ctslQUASI_counts.csv",
  row.names = 1)
ct.stsl <- read.csv("benchmark/4-rollins/ctstsl_counts.csv",
  row.names = 1)
ct.groups <- read.csv("benchmark/4-rollins/ct_groups.csv",
  stringsAsFactors = FALSE)

# Remove features with ALL 0s
all0s <- rowSums(ct.fmd) == 0 |
  rowSums(ct.quasi) == 0 |

```



```

rowSums(ct.stsl) == 0

# Check that sample names are consistent
data.frame(
  colnames(ct.fmd),
  colnames(ct.quasi),
  colnames(ct.stsl),
  ct.groups[,1]
)

#####
# DE runs
#####

library(yuck)
res := for(counts in list(ct.fmd, ct.quasi, ct.stsl))
  append(
    list(edgeR.williams(counts[!all0s,], ct.groups$caneToad.groups)),
    lapply(c("clr", "iqlr", "iil"), function(method){
      ALDEx2.williams(counts[!all0s,], ct.groups$caneToad.groups, method)
    })
  )

save(res, file = "benchmark/4-rollins/fig6-backup.RData")

#####
# overlap
#####

library(yuck)
DE := for(result in res)
  list(
    "edgeR" = rownames(result[[1]]$table)[result[[1]]$table$FDR < .05],
    "clr" = rownames(result[[2]])[result[[2]]$FDR < .05],
    "iqlr" = rownames(result[[3]])[result[[3]]$FDR < .05],
    "iil" = rownames(result[[4]])[result[[4]]$FDR < .05]
  )

library(Vennerable)
library(grid)
jpeg("benchmark/4-rollins/fig6a.jpg", width = 9, height = 3, units = "in", res =
600)
gridExtra::grid.arrange(
  grid::grid.grabExpr(
    plot(Venn(DE[[1]]), doWeights = FALSE, type = "ellipses")
  ), top-textGrob("Gene Overlap Diagram for Cane Toad Transcripts Aligned by the
slFMD Method", gp = gpar(fontsize = 16))
)
dev.off()

jpeg("benchmark/4-rollins/fig6b.jpg", width = 9, height = 3, units = "in", res =
600)
gridExtra::grid.arrange(
  grid::grid.grabExpr(
    plot(Venn(DE[[2]]), doWeights = FALSE, type = "ellipses")
  ), top-textGrob("Gene Overlap Diagram for Cane Toad Transcripts Aligned by the
slQUASI Method", gp = gpar(fontsize = 16))
)
dev.off()

jpeg("benchmark/4-rollins/fig6c.jpg", width = 9, height = 3, units = "in", res =
600)
gridExtra::grid.arrange(
  grid::grid.grabExpr(
    plot(Venn(DE[[3]]), doWeights = FALSE, type = "ellipses")
  ), top-textGrob("Gene Overlap Diagram for Cane Toad Transcripts Aligned by the
stsl Method", gp = gpar(fontsize = 16))
)
dev.off()

# Use ImageMagick to merge
system("convert -append benchmark/4-rollins/fig6a.jpg benchmark/4-rollins/

```

```

fig6b.jpg benchmark/4-rollins/fig6c.jpg benchmark/4-rollins/fig6.jpg')

#####
# FC plot
#####

# Differences between edgeR and ALDEx2 precision not easily explained by log-fold
change
ES := for(result in res)
  list(
    "edgeR" = result[[1]]$table$logFC[result[[1]]$table$FDR < .05],
    "clr" = result[[2]]$diff.btw[result[[2]]$FDR < .05],
    "iqlr" = result[[3]]$diff.btw[result[[3]]$FDR < .05],
    "iil" = result[[4]]$diff.btw[result[[4]]$FDR < .05]
  )

names(ES) <- c("slFMD", "slQUASI", "stsl")
ESout := for(es in c("slFMD", "slQUASI", "stsl"))
  for(i in c("edgeR", "clr", "iqlr", "iil"))
    data.frame("process" = es, "method" = i, "FC" = ES[[es]][[i]])

library(ggplot2)
df <- do.call("rbind", ESout)
df$FC <- abs(df$FC)
g <- ggplot(df, aes(x = method, y = FC, col = method)) + facet_grid(. ~ process) +
  geom_violin() + geom_boxplot(width = .15) + scale_colour_brewer(palette = "Set1")
+
  ylab("Mean (edgeR) or Median (ALDEx2)\nBetween-Group Differences") +
  theme_bw() + xlab("Differential Expression (DE) Method") + labs(col = "DE
Method") +
  ggtitle("Absolute Between-Group Differences for DE Transcripts (Cane Toad Data)")

jpeg("benchmark/4-rollins/fig7.jpg", width = 10, height = 10, units = "in", res =
600)
plot(g)
dev.off()

```

```

setwd("/home/thom/Dropbox/R/projects/nanuscpts/")

#####
# import
#####

load("benchmark/4-rollins/fig6-backup.RData")

ct.fmd <- read.csv("benchmark/4-rollins/ctslFMD_counts.csv",
                  row.names = 1)
ct.quasi <- read.csv("benchmark/4-rollins/ctslQUASI_counts.csv",
                    row.names = 1)
ct.stsl <- read.csv("benchmark/4-rollins/ctstsl_counts.csv",
                   row.names = 1)

counts <- list(ct.fmd, ct.quasi, ct.stsl)
names <- list("slFMD", "slQUASI", "stsl")

library(yuck)
DE := for(result in res)
  list(
    "edgeR" = rownames(result[[1]]$table)[result[[1]]$table$FDR < .05],
    "clr" = rownames(result[[2]])[result[[2]]$FDR < .05],
    "iqlr" = rownames(result[[3]])[result[[3]]$FDR < .05],
    "iil" = rownames(result[[4]])[result[[4]]$FDR < .05]
  )

#####
# failed recall data
#####

found.ALDEx2any := for(d in DE) union(union(d[[2]], d[[3]]), d[[4]])
found.edgeRonly := for(i in 1:length(DE)) setdiff(DE[[i]][[1]], found.ALDEx2any[[i]])

est <- function(x) mean(x)
est.ALDEx2any := for(i in 1:length(counts))
  data.frame("name" = names[[i]], "type" = "ALDEx2",
            "value" = apply(counts[[i]][found.ALDEx2any[[i]],], 1, est))
est.edgeRonly := for(i in 1:length(counts))
  data.frame("name" = names[[i]], "type" = "edgeR only",
            "value" = apply(counts[[i]][found.edgeRonly[[i]],], 1, est))

df <- rbind(do.call(rbind, est.ALDEx2any), do.call(rbind, est.edgeRonly))
df$type <- factor(as.character(df$type), levels = c("edgeR only", "ALDEx2"))

wilcox.test(value ~ type, df)

#####
# failed recall plot
#####

base_breaks <- function(n = 10){
  function(x) {
    axisTicks(log10(range(x, na.rm = TRUE)), log = TRUE, n = n)
  }
}

jpeg("benchmark/4-rollins/fig8.jpg", width = 10, height = 10, units = "in", res =
600)
library(ggplot2)
library(scales)
ggplot(df, aes(x = type, y = value, col = type)) + facet_grid(. ~ name) +
  geom_violin() + geom_boxplot(width = .15) + scale_colour_brewer(palette = "Set1")
+
  scale_y_continuous(trans = "log10", breaks = base_breaks()) +
  ylab("Average Abundances for DE Transcripts\n(counts per sample)") +
  theme_bw() + xlab("Differential Expression (DE) Method") + labs(col = "DE
Method") +

```

```
  ggtitle("Average Abundances for DE Transcripts Called by edgeR Only (Cane Toad  
Data)")  
dev.off()
```
